# Supplementary material for: A large-scale stochastic spatiotemporal model for Aedes albopictus-borne chikungunya epidemiology
Source: PLOS journal article supplement (doi:10.1371/journal.pone.0174293), 2017-03-31
Supplement: S1 (10.1371/journal.pone.0174293.s001) [file journal.pone.0174293.s001]

## Supporting Text S1: Age-dependent survival

In models of age-independent survival, daily survival probability depends on environmental factors, such as temperature, but not on the age of vectors. With age-dependent survival, we assumed that the survival time of adult vectors is described by a gamma distribution [1]. In other words, we let the probability of surviving precisely  $x$  days be described by a gamma distribution.

According to this, daily survival probability of a vector of age  $d$  days can be calculated as complementary to the ratio of the probability of  $x$  being between day  $d$  and  $d + 1$  to the total probability of surviving at least  $d$  days,

$$p_d = 1 - \frac{\Pr(d < x \leq d + 1)}{\Pr(d < x)},$$

where  $p_d$  represents daily survival probability in a stochastic context, or the daily expected fraction of survivors in a deterministic context.

The survival probability can be re-written as

$$p_d = 1 - \frac{F(d + 1; \mu, \sigma) - F(d; \mu, \sigma)}{1 - F(d; \mu, \sigma)},$$

where  $F(\cdot)$  is the cumulative distribution function of the gamma distribution with shape and scale parameters corresponding to a mean of  $\mu$  days and a standard deviation of  $\sigma$  days.

Gamma distribution can be parameterised differently in different contexts. For instance, in GNU Scientific Library [2], it is implemented with a shape parameter  $k$  and a scale parameter  $\theta$ , for which the first and second moments are  $k\theta$  and  $k\theta^2$ , respectively. In this context, we chose to use mean,  $\mu$ , and standard deviation,  $\sigma$ , as biologically meaningful parameters to describe the distribution, and calculated  $k$  and  $\theta$  to match with the given  $\mu$  and  $\sigma$ .

## References

1. Wearing HJ, Rohani P, Keeling MJ (2005) Appropriate models for the management of infectious diseases. PLoS Med 2: e174.
2. Galassi M, et al. Gnu scientific library reference manual (3rd ed.). ISBN 0954612078. URL <http://www.gnu.org/software/gsl>.
